# Supplementary material for: Estimating the burden of nosocomial exposure to tuberculosis in South Korea, a nationwide population based cross-sectional study
Source: PubMed Central journal article supplement — Korean J Intern Med. 2020 Dec 18;36(5):1134–45. doi: 10.3904/kjim.2020.144 (PMC8435488; doi:10.3904/kjim.2020.144), 2020-12-18
Supplement: kjim-2020-144-suppl.pdf [file kjim-2020-144-suppl.pdf]

**Supplementary Table 1. ICD-10 codes representing each category of Charlson comorbidity index**

| Categories of Charlson comorbidity index              | ICD-10 code                                                                                                                                                                   |
|-------------------------------------------------------|-------------------------------------------------------------------------------------------------------------------------------------------------------------------------------|
| <b>Respiratory diseases</b>                           |                                                                                                                                                                               |
| Chronic pulmonary disease                             | I27.8, I27.9, J40.x–J47.x, J60.x–J67.x, J68.4, J70.1, J70.3                                                                                                                   |
| <b>Cardiovascular diseases</b>                        |                                                                                                                                                                               |
| Myocardial infarction                                 | I21.x, I22.x, I25.2                                                                                                                                                           |
| Congestive heart failure                              | I09.9, I11.0, I13.0, I13.2, I25.5, I42.0, I42.5–I42.9, I43.x, I50.x, P29.0                                                                                                    |
| Peripheral vascular disease                           | I70.x, I71.x, I73.1, I73.8, I73.9, I77.1, I79.0, I79.2, K55.1, K55.8, K55.9, Z95.8, Z95.9                                                                                     |
| <b>Malignant neoplasms</b>                            |                                                                                                                                                                               |
| Any malignancy, including lymphoma and leukemia       | C00.x–C26.x, C30.x–C34.x, C37.x–C41.x, C43.x, C45.x–C58.x, C60.x–C76.x, C81.x–C85.x, C88.x, C90.x–C97.x                                                                       |
| Metastatic solid tumor                                | C77.x–C80.x                                                                                                                                                                   |
| <b>Endocrine diseases</b>                             |                                                                                                                                                                               |
| Diabetes without chronic complication                 | E10.0, E10.1, E10.6, E10.8, E10.9, E11.0, E11.1, E11.6, E11.8, E11.9, E12.0, E12.1, E12.6, E12.8, E12.9, E13.0, E13.1, E13.6, E13.8, E13.9, E14.0, E14.1, E14.6, E14.8, E14.9 |
| Diabetes with chronic complication                    | E10.2–E10.5, E10.7, E11.2–E11.5, E11.7, E12.2–E12.5, E12.7, E13.2–E13.5, E13.7, E14.2–E14.5, E14.7                                                                            |
| <b>Renal diseases</b>                                 |                                                                                                                                                                               |
| Renal disease                                         | I12.0, I13.1, N03.2–N03.7, N05.2–N05.7, N18.x, N19.x, N25.0, Z49.0–Z49.2, Z94.0, Z99.2                                                                                        |
| <b>Gastrointestinal diseases</b>                      |                                                                                                                                                                               |
| Peptic ulcer disease                                  | K25.x–K28.x                                                                                                                                                                   |
| Mild liver disease                                    | B18.x, K70.0–K70.3, K70.9, K71.3–K71.5, K71.7, K73.x, K74.x, K76.0, K76.2–K76.4, K76.8, K76.9, Z94.4                                                                          |
| Moderate or severe liver disease                      | I85.0, I85.9, I86.4, I98.2, K70.4, K71.1, K72.1, K72.9, K76.5, K76.6, K76.7                                                                                                   |
| <b>Psychological diseases</b>                         |                                                                                                                                                                               |
| Dementia                                              | F00.x–F03.x, F05.1, G30.x, G31.1                                                                                                                                              |
| <b>Neurological diseases</b>                          |                                                                                                                                                                               |
| Cerebrovascular disease                               | G45.x, G46.x, H34.0, I60.x–I69.x                                                                                                                                              |
| Hemiplegia or paraplegia                              | G04.1, G11.4, G80.1, G80.2, G81.x, G82.x, G83.0–G83.4, G83.9                                                                                                                  |
| <b>Musculoskeletal and connective tissue diseases</b> |                                                                                                                                                                               |
| Connective tissue disease                             | M05.x, M06.x, M31.5, M32.x–M34.x, M35.1, M35.3, M36.0                                                                                                                         |
| <b>Infectious diseases</b>                            |                                                                                                                                                                               |
| AIDS                                                  | B20.x–B22.x, B24.x                                                                                                                                                            |

ICD-10, International Classification of Diseases, 10th Revision; AIDS, acquired immune deficiency syndrome.
